# Supplementary material
Source: Elsevier journal article supplement (https://authors.library.caltech.edu/47361/11/mmc3.xlsx)
Supplement: mmc3 [file mmc3.xlsx]

## Sheet: Sheet1
Sample subset	Variable 1	Variable 2	r	p	95% confidence alpha	% confidence
brachiopods	temperature	log of Fe concentration	0.405672	0.0948644	0.00555556	not significant
brachiopods	temperature	log of Mn concentration	0.0311601	0.902314	0.00555556	not significant
brachiopods	temperature	log of Sr concentration	-0.349706	0.154867	0.00555556	not significant
rugose corals	temperature	log of Fe concentration	-0.294371	0.221194	0.00555556	not significant
rugose corals	temperature	log of Mn concentration	-0.0918364	0.708463	0.00555556	not significant
rugose corals	temperature	log of Sr concentration	-0.520401	0.0223575	0.00555556	79.8782
micrites & cements	temperature	log of Fe concentration	-0.301181	0.368109	0.00555556	not significant
micrites & cements	temperature	log of Mn concentration	-0.465202	0.149344	0.00555556	not significant
micrites & cements	temperature	log of Sr concentration	-0.404531	0.217181	0.00555556	not significant
all fossils	temperature	log of Fe concentration	0.140743	0.406047	0.0166667	not significant
all fossils	temperature	log of Mn concentration	0.273955	0.100845	0.0166667	69.7466
all fossils	temperature	log of Sr concentration	-0.494669	0.00185651	0.0166667	99.443
all samples	temperature	log of Fe concentration	0.226107	0.122271	0.0166667	63.3188
all samples	temperature	log of Mn concentration	0.278925	0.0548832	0.0166667	83.535
all samples	temperature	log of Sr concentration	-0.417747	0.00313344	0.0166667	99.06
